# Supplementary material for: Dietary calcium intake and mortality risk from cardiovascular disease and all causes: a meta-analysis of prospective cohort studies
Source: PubMed Central journal article supplement (PMC4199062; doi:10.1186/s12916-014-0158-6), 2014-09-25

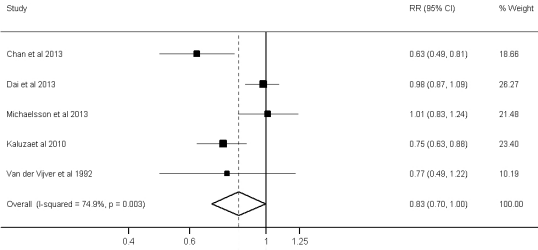

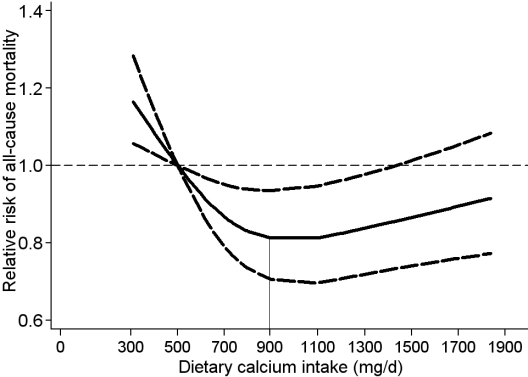

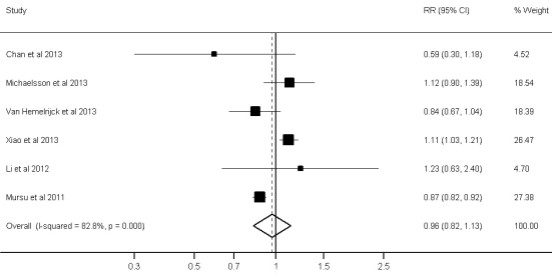

Supplement: 12916_2014_158_MOESM2_ESM.pdf [file 12916_2014_158_MOESM2_ESM.pdf]
